# Supplementary material
Source: PubMed Central journal article supplement (PMC2572918)
Supplement: 0804253105_ST1.pdf [file 0804253105_ST1.pdf]

Table S1. Structure matrix for discriminant function analysis with eigenvalues and percent of total variance explained for significant discriminant functions recovered

|                  |      | DF 1  | DF 2  |
|------------------|------|-------|-------|
| MtDNA            | CytB | 0.515 | 0.482 |
|                  | ATP6 | 0.657 | 0.475 |
| Nuc DNA          | CytC | 0.198 | 0.585 |
|                  | ATPc | 0.176 | 0.653 |
| Eigenvalues      |      | 4.589 | 1.291 |
| Percent variance |      | 76%   | 22%   |

Mitochondrial genes are more strongly weighted for the primary discriminant function, while all genes are nearly equally weighted for the secondary discriminant function.
