# Supplementary material
Source: PubMed Central journal article supplement (PMC2572918)
Supplement: 0804253105_ST2.pdf [file 0804253105_ST2.pdf]

**AB mtDNA**

|        | AB     | <u>Matched</u> |         | <u>Mismatched</u> |         |
|--------|--------|----------------|---------|-------------------|---------|
|        |        | ABxSD          | ABxSCN  | ABxSD             | ABxSCN  |
| AB     | ---    | 0.3984         | 1.0000  | <0.0001           | <0.0001 |
| ABxSD  | 0.1670 | ---            | 0.1004  | <0.0001           | 0.0068  |
| ABxSCN | 1.0000 | 0.2332         | ---     | <0.0001           | <0.0001 |
| SDxAB  | 0.0002 | <0.0001        | <0.0001 | ---               | 1.0000  |
| SCNxAB | 0.0004 | <0.0001        | <0.0001 | 1.0000            | ---     |

**SCN mtDNA**

|        | SCN    | <u>Matched</u> |        | <u>Mismatched</u> |         |
|--------|--------|----------------|--------|-------------------|---------|
|        |        | SCNxSD         | SCNxAB | SCNxSD            | SCNxAB  |
| SCN    | ---    | 1.0000         | 1.0000 | <0.0001           | 0.0012  |
| SCNxSD | 1.0000 | ---            | 1.0000 | <0.0001           | 0.0005  |
| SCNxAB | 0.6734 | 1.0000         | ---    | <0.0001           | <0.0001 |
| SDxSCN | 0.0489 | 0.0024         | 0.0001 | ---               | 0.0071  |
| ABxSCN | 1.0000 | 0.4030         | 0.0439 | 0.7301            | ---     |

**SD mtDNA**

|        | SD     | <u>Matched</u> |         | <u>Mismatched</u> |         |
|--------|--------|----------------|---------|-------------------|---------|
|        |        | SDxAB          | SDxSCN  | SDxAB             | SDxSCN  |
| SD     | ---    | <0.0001        | <0.0001 | 0.0009            | 0.0227  |
| SDxAB  | 0.7900 | ---            | 1.0000  | <0.0001           | <0.0001 |
| SDxSCN | 1.0000 | 1.0000         | ---     | <0.0001           | <0.0001 |
| ABxSD  | 0.3383 | 0.0046         | 0.0390  | ---               | 1.0000  |
| SCNxSD | 0.1051 | 0.0010         | 0.0151  | 1.0000            | ---     |

**Table S2. ANOVA of primary discriminant functions** No significant differences were found among control treatment genotype classes and all control treatment genotype classes were significantly different than all stress treatment genotype classes (data not shown). More complex results resulted from comparisons between genotypes within hypoosmotic stress treatment. Results for discriminant function 1 are shown above the diagonal; results for discriminant function 2 are shown below the diagonal. Data are grouped by mtDNA genotype. ANOVA with Bonferroni post-hoc comparisons ( $\alpha=0.05$ ).
